# Supplementary material for: Efficacy and safety of Finerenone in patients with chronic kidney disease associated with type 2 diabetes. Latin American Experience: Findkdlatam Trial
Source: Research Square preprint supplement (doi:10.21203/rs.3.rs-6901339/v1), 2025-06-25
Supplement: Supplementary file 1 [file 2a40f09ade6256144654d76c.docx]

**Table 6. Heat map for stratifying cardiovascular risk according to GFR and ACR in diabetic patients at baseline assessment**

| CKD classification | | | | | | | | | ACR | | | | | | | | | |
| --- | --- | --- | --- | --- | --- | --- | --- | --- | --- | --- | --- | --- | --- | --- | --- | --- | --- | --- |
| A1 | | | A2 | | | | A3 | | |
| Normal or average increase | | | Moderate increase | | | | Severe increase | | |
| <30 mg/g | | | 30-299 mg/g | | | | ≥300 mg/g | | |
| GFR categories (mL/min/1.73 m2) | G1 | | Normal or high | | | | ≥ 90 | | **0 (0.0)** | | | **3 (0.9)** | | | | **5 (1.5)** | | |
| G2 | | Average decrease | | | | 60-89 | | **1 (0.3)** | | | **15 (4.4)** | | | | **18 (5.3)** | | |
| G3 | | Average to moderate decrease | | | | 45-59 | | **2 (0.6)** | | | **43 (12.6)** | | | | **44 (12.9)** | | |
| G4 | | Moderate to severe decrease | | | | 30-44 | | **0 (0.0)** | | | **52 (15.2)** | | | | **84 (24.6)** | | |
| G5 | | Severe decrease | | | | 15-29 | | **0 (0.0)** | | | **26 (7.6)** | | | | **49 (14.3)** | | |
| G6 | | Kidney failure | | | | < 15 | | **0 (0.0)** | | | **0 (0.0)** | | | | **0 (0.0)** | | |
|  | |  | |  |  |  |  |  | |  |  | | |  |  | | |  |
|  | | **Moderate risk** | | |  |  | **High risk** | | |  |  | | **Very high risk** | | | |  | |
|  | |  | |  |  |  |  |  | |  |  | | |  |  | | |  |
| **Severe target organ damage is defined as follows:**  **·** Estimated glomerular filtration rate (eGFR) < 45 ml/min/1.73 m2 independent of albuminuria  **· ACR (albuminuria/creatinuria ratio) > 300mg/g:** (A3) independent of eGFR  **·** GFRe 45-59 ml/min/1.73m2 with ACR 30-300 mg/g (A2)  **·** Presence of microangiopathy in at least three locations (e.g., albuminuria (Stage A2) retinopathy and neuropathy | | | | | | | | | | | | | | | | | | |
