# Supplementary material for: Efficacy and safety of Finerenone in patients with chronic kidney disease associated with type 2 diabetes. Latin American Experience: Findkdlatam Trial
Source: Research Square preprint supplement (doi:10.21203/rs.3.rs-6901339/v1), 2025-06-25
Supplement: Supplementary file 2 [file 3279de37e8b610c583e7a912.docx]

**Table 7. Heat map for stratifying cardiovascular risk according to GFR and ACR in diabetic patients at 6-month assessment**

| CKD classification | | | | | | | | | ACR | | | | | | | | | |
| --- | --- | --- | --- | --- | --- | --- | --- | --- | --- | --- | --- | --- | --- | --- | --- | --- | --- | --- |
| A1 | | | A2 | | | | A3 | | |
| Normal or average increase | | | Moderate increase | | | | Severe increase | | |
| <30 mg/g | | | 30-299 mg/g | | | | ≥300 mg/g | | |
| GFR categories (mL/min/1.73 m2) | G1 | | Normal or high | | | | ≥ 90 | | **2 (0.6)** | | | **4 (1.3)** | | | | **1 (0.3)** | | |
| G2 | | Average decrease | | | | 60-89 | | **11 (3.5)** | | | **19 (6.1)** | | | | **5 (1.6)** | | |
| G3 | | Average to moderate decrease | | | | 45-59 | | **9 (2.9)** | | | **74 (23.6)** | | | | **10 (3.2)** | | |
| G4 | | Moderate to severe decrease | | | | 30-44 | | **18 (5.7)** | | | **62 (19.7)** | | | | **5 (1.6)** | | |
| G5 | | Severe decrease | | | | 15-29 | | **40 (12.7)** | | | **38 (12.1)** | | | | **16 (5.1)** | | |
| G6 | | Kidney failure | | | | < 15 | | **0 (0.0)** | | | **0 (0.0)** | | | | **0 (0.0)** | | |
|  | |  | |  |  |  |  |  | |  |  | | |  |  | | |  |
|  | | **Moderate risk** | | |  |  | **High risk** | | |  |  | | **Very high risk** | | | |  | |
| **Severe target organ damage is defined as follows:**  **·** Estimated glomerular filtration rate (eGFR) < 45 ml/min/1.73 m2 independent of albuminuria  **· ACR (albuminuria/creatinuria ratio) > 300mg/g:** (A3) independent of eGFR  **·** GFRe 45-59 ml/min/1.73m2 with ACR 30-300 mg/g (A2)  **·** Presence of microangiopathy in at least three locations (e.g., albuminuria (Stage A2) retinopathy and neuropathy | | | | | | | | | | | | | | | | | | |
